# Supplementary material
Source: MDPI journal article supplement (https://www.mdpi.com/1424-8247/15/4/403)
Supplement: s1 [file s1]

**Table S1:** Description of patients with major resistance mutations and INSTIs polymorphisms/substitutions at the pre-ART GRT: viroimmunological data and therapeutic management.

|            | NNRTIs, NRTIs and<br>PIs Major Resistance<br>Mutations/INSTIs<br>Polymorphism or<br>Substitutions | Baseline VL<br>(copies/mL) | Baseline<br>CD4 Count<br>(cell/mm <sup>3</sup> ) | Initial ART       | ART<br>Change | Reason for<br>Changing        |
|------------|---------------------------------------------------------------------------------------------------|----------------------------|--------------------------------------------------|-------------------|---------------|-------------------------------|
| Patient 1  | K103N                                                                                             | 3.873.430                  | 354                                              | TDF/FTC+DRV/r+RAL | Y             | simplification                |
| Patient 2  | E138A                                                                                             | 6.018                      | 951                                              | TDF/FTC+DRV/r+RAL | Y             | simplification                |
| Patient 3  | G190A                                                                                             | 225.709                    | 605                                              | TDF/FTC+DRV/r+RAL | Y             | simplification                |
| Patient 4  | M41L; V106A                                                                                       | 183.894                    | 343                                              | TDF/FTC+DRV/r+RAL | Y             | simplification                |
| Patient 5  | E138A                                                                                             | 108.779.000                | 341                                              | TDF/FTC+DRV/r+RAL | Y             | simplification                |
| Patient 6  | K103N                                                                                             | 10.733                     | 876                                              | TDF/FTC+DTG       | N             | /                             |
| Patient 7  | E138A                                                                                             | 18.474.400                 | 427                                              | TDF/FTC+DTG       | N             | /                             |
| Patient 8  | K103N                                                                                             | 44612                      | 359                                              | TDF/FTC+DTG       | N             | /                             |
| Patient 9  | E138G                                                                                             | 332.394                    | 697                                              | TDF/FTC+DTG       | N             | /                             |
| Patient 10 | E138A                                                                                             | 165398                     | 319                                              | TDF/FTC+DRV/r+RAL | Y             | simplification                |
| Patient 11 | M184V                                                                                             | 160929                     | 529                                              | TDF/FTC+DRV/r+RAL | Y             | simplification                |
| Patient 12 | E138A                                                                                             | 44463                      | 429                                              | TDF/FTC+DRV/C+RAL | N             | /                             |
| Patient 13 | E138A                                                                                             | 345518                     | 155                                              | TDF/FTC+DRV/C+RAL | N             | /                             |
| Patient 14 | T79A                                                                                              | 38732                      | 988                                              | TDF/FTC+DRV/R+RAL | NA            |                               |
| Patient 15 | T79A                                                                                              | 7378                       | 625                                              | TDF/FTC+DRV/C+RAL | Y             | RAL withdrawal<br>due to T97A |

Notes: Abbreviations: NNRTIs, non-nucleoside reverse transcriptase inhibitors; NRTIs, nucleoside reverse transcriptase inhibitors; PIs protease inhibitors; INSTI integrase stand transfer inhibitors, VL viral load, ART antiretroviral regimen, TDF tenofovir disoproxil fumarate, FTC emtricitabine, DTG dolutegravir, RAL raltegravir, DRV/r darunavir/ritonavir, DRV/c darunavir/cobicistat, N no, Y yes.
